# Supplementary material
Source: PubMed Central journal article supplement (PMC2147661)
Supplement: 1475-2883-2-S1-S9-S1.pdf [file 1475-2883-2-S1-S9-S1.pdf]

## Additional file 1. Assumptions used in the decision model

### *Point of reference / population*

All persons living in an area or region that:

- 1) meets REMO criteria for mass treatment with Mectizan® (i.e., considered hyper- or meso-endemic for onchocerciasis)
- 2) appears to be “at risk” for loiasis based on the environmental risk model map
- 3) has not yet received Mectizan® mass treatment

### *Timeframe*

Risks of onchocerciasis, onchocercal blindness, onchocercal skin disease, and treatment-associated *Loa* encephalopathy are considered as lifetime risks.

Once a community and an individual begin annual Mectizan® treatment, they continue ‘forever’.

### *Endemicity of Onchocerciasis*

| Percentage of communities that are actually: | High-risk scenario | Low-risk scenario |
|----------------------------------------------|--------------------|-------------------|
| Hyper-endemic for onchocerciasis             | 60%                | 30%               |
| Meso-endemic for onchocerciasis              | 30%                | 30%               |
| Hypo-endemic for onchocerciasis              | 10%                | 40%               |

### *Endemicity of Loiasis*

#### *Distribution of *Loa loa* infection risk, by community*

|                                                                                                                           | High-risk | Low-risk |
|---------------------------------------------------------------------------------------------------------------------------|-----------|----------|
| Percentage of communities in which <b>no one</b> has <i>L. loa</i> microfilaremia of $\geq 30,000$ per ml                 | 40%       | 90%      |
| Percentage of communities in which <b>0.1 – 0.9%</b> of persons have <i>L. loa</i> microfilaremia of $\geq 30,000$ per ml | 35%       | 7%       |
| Percentage of communities in which <b>1.0 – 1.9%</b> of persons have <i>L. loa</i> microfilaremia of $\geq 30,000$ per ml | 15%       | 3%       |
| Percentage of communities in which <b>2.0 – 3.9%</b> of persons have <i>L. loa</i> microfilaremia of $\geq 30,000$ per ml | 7%        | 0        |
| Percentage of communities in which <b>4.0 – 7.9%</b> of persons have <i>L. loa</i> microfilaremia of $\geq 30,000$ per ml | 3         | 0        |
| Percentage of communities in which $\geq 8\%$ of persons have <i>L. loa</i> microfilaremia of $\geq 30,000$ per ml        | 0         | 0        |

*Prevalence of individuals with  $> 30,000$  mf per ml, based on community risk (mid-point assumption).*

|                                                                                         |    |
|-----------------------------------------------------------------------------------------|----|
| Percentage of individuals who have <i>L. loa</i> microfilaremia of $\geq 30,000$ per ml | 0% |
|-----------------------------------------------------------------------------------------|----|

|                                                                                                        |      |
|--------------------------------------------------------------------------------------------------------|------|
| – in communities where <b>no one</b> has <i>L. loa</i> microfilaremia of $\geq 30,000$                 |      |
| Percentage of individuals who have <i>L. loa</i> microfilaremia of $\geq 30,000$ per ml                | 0.5% |
| – in communities where <b>0.1 – 0.9%</b> of persons have <i>L. loa</i> microfilaremia of $\geq 30,000$ |      |
| Percentage of individuals who have <i>L. loa</i> microfilaremia of $\geq 30,000$ per ml                | 1.5% |
| – in communities where <b>1.0– 1.9%</b> of persons have <i>L. loa</i> microfilaremia of $\geq 30,000$  |      |
| Percentage of individuals who have <i>L. loa</i> microfilaremia of $\geq 30,000$ per ml                | 3.0% |
| – in communities where <b>2.0 – 3.9%</b> of persons have <i>L. loa</i> microfilaremia of $\geq 30,000$ |      |
| Percentage of individuals who have <i>L. loa</i> microfilaremia of $\geq 30,000$ per ml                | 6.0% |
| – in communities where <b>4.0 – 7.9%</b> of persons have <i>L. loa</i> microfilaremia of $\geq 30,000$ |      |
| Percentage of individuals who have <i>L. loa</i> microfilaremia of $\geq 30,000$ per ml                | 10%  |
| – in communities where $\geq 8\%$ of persons have <i>L. loa</i> microfilaremia of $\geq 30,000$        |      |

*Performance of RAPLOA (estimates based on Figure 1).*

|                                                                                                                                                    | <b>RAPLOA-40</b> | <b>RAPLOA-20</b> |
|----------------------------------------------------------------------------------------------------------------------------------------------------|------------------|------------------|
| Probability of community testing RAPLOA-positive in which <b>no one</b> has <i>L. loa</i> microfilaremia of $\geq 30,000$ per ml (1 – specificity) | 5%               | 50%              |
| Probability of community testing RAPLOA-positive in which <b>0 – 0.9%</b> of persons have <i>L. loa</i> microfilaremia of $\geq 30,000$ per ml     | 50%              | 100%             |
| Probability of community testing RAPLOA-positive in which <b>1 – 1.9%</b> of persons have <i>L. loa</i> microfilaremia of $\geq 30,000$ per ml     | 70%              | 100%             |
| Probability of community testing RAPLOA-positive in which $\geq 2\%$ of persons have <i>L. loa</i> microfilaremia of $\geq 30,000$ per ml          | 100%             | 100%             |
| Sensitivity in detecting potentially ‘at risk’ communities                                                                                         | 50 - 100%        | 100%             |
| Specificity in detecting potentially ‘at risk’ communities                                                                                         | 95%              | 50%              |

*Risk of Onchocercal Disease in the Absence of Treatment*

Mean lifetime risk of blindness in persons born into and living in areas:

|                                  |     |
|----------------------------------|-----|
| Hyper-endemic for onchocerciasis | 25% |
| Meso-endemic for onchocerciasis  | 5%  |
| Hypo-endemic for onchocerciasis  | 1%  |

Mean lifetime risk of skin disease in persons born into and living in areas:

|                                  |     |
|----------------------------------|-----|
| Hyper-endemic for onchocerciasis | 50% |
| Meso-endemic for onchocerciasis  | 30% |
| Hypo-endemic for onchocerciasis  | 15% |

Note: these figures would underestimate risk of skin disease in areas where the sowda form of onchocerciasis predominates.

### *Drug coverage*

Coverage with mass Mectizan® treatment in hyper- and meso-endemic communities is 65% of total population.

Coverage with passive (individual) Mectizan® treatment in hypo-endemic communities is 10% of total population.

Once an individual begins to take Mectizan®, he/she continues 'forever'.  
Compliance with annual Mectizan® is systematic (i.e., the same 65% of the population receives Mectizan® every year).

### *Benefits of treatment with Mectizan®*

Risk of new blindness in persons treated annually with Mectizan® if they had no previous posterior segment eye lesions: 0%

Risk of future skin disease in persons treated annually with Mectizan®: 0%

### *Risks of treatment with Mectizan®*

Risks other than *L. loa* encephalopathy not considered.

*L. loa* encephalopathy does not occur in persons with microfilarial density of <30,000 per ml blood.

Risk of *L. loa* encephalopathy following the first Mectizan® treatment in persons with *L. loa* microfilarial density of  $\geq 30,000$ : 1%

Risk of *L. loa* encephalopathy following the second annual Mectizan® treatment in persons who initially (pre-first-year treatment) had *L. loa* microfilarial density of  $\geq 30,000$ : 0.1%

Risk of *L. loa* encephalopathy following third and subsequent annual Mectizan® treatment in persons who initially (pre-first-year treatment) had *L. loa* microfilarial density of  $\geq 30,000$ : 0%

*Risk of permanent sequelae of L. loa encephalopathy*

Risk of dying from *L. loa* encephalopathy without supportive care: 50%

Risk of dying from *L. loa* encephalopathy with supportive care: 5%

Risk of permanent neurologic sequelae following *L. loa* encephalopathy in the absence of supportive care: 25%

Risk of permanent neurologic sequelae following *L. loa* encephalopathy if the patient receives supportive care\*: 5%

\* Supportive care includes hydration, skin care, eye care, anti-infective treatment for nosocomial infections and rehabilitation.

*Values for disability-adjusted life years (DALYs) lost for specific conditions*

|                                                                      |      |
|----------------------------------------------------------------------|------|
| Death                                                                | 20   |
| <i>L. loa</i> encephalopathy                                         | 0.2  |
| Permanent neurologic sequelae following <i>L. loa</i> encephalopathy | 10   |
| Onchocercal blindness                                                | 8.3  |
| Onchocercal skin disease                                             | 0.34 |
